# Supplementary material
Source: PubMed Central journal article supplement (PMC4364000)
Supplement: NIHMS617427-supplement-01.pdf [file NIHMS617427-supplement-01.pdf]

**Supplemental Information**

**Lymphotoxin beta receptor signaling limits mucosal damage through driving IL-23 production by epithelial cells**

Elise Macho-Fernandez, Ekaterina P. Koroleva, Cody M. Spencer, Michael Tighe, Egidio Torrado, Andrea M. Cooper, Yang-Xin Fu, and Alexei V. Tumanov

Supplemental information includes supplementary materials and methods and 6 figures

## Supplementary materials and methods

**Immunohistochemistry and immunofluorescence.** Detection of apoptotic cells was performed on paraffin embedded tissue sections using the Click-iT® TUNEL Alexa Fluor® 647 Imaging Assay (Invitrogen), according to the manufacturer's instructions. Proliferation of epithelial cells was measured using BrdU 3h pulse incorporation. Mice were injected i.p. with 50  $\mu\text{g/g}$  BrdU (BD Biosciences) followed by anti-BrdU antibody immunohistostaining (RDI Fitzgerald). For MUC2 staining, frozen colon sections were fixed with 10% neutral buffered formalin for 10 minutes and treated with 3% (v/v) hydrogen peroxide for 30 minutes at room temperature. The sections were then incubated with PBS containing 0.3% Triton X100, 0.1% BSA, and 5% goat serum for 1h. Sections were stained overnight at 4°C with a Mucin 2 specific antibody (H300, 1:100 dilution; Santa Cruz Biotechnology Inc.) and subsequently incubated with a biotinylated anti-rabbit antibody (1:100 dilution; Vector Laboratories), followed by streptavidin HRP (1:200 dilution; eBioscience). Sections were developed with an AEC peroxidase substrate kit (Vector Laboratories), according to the manufacturer's instructions. For GFP detection, frozen colon sections were vapor fixed with 37% PFA for 1h at -20°C and blocked with 10% normal mouse serum in PBS for 30 minutes. Sections were stained for 1h with a biotin goat anti-GFP primary antibody (BA-0702, 1:100 dilution; Vector Laboratories) followed by a anti-goat-488 secondary antibody (1:100 dilution; Invitrogen) and Hoechst (1:200 dilution) for 1h.

**Isolation of intestinal epithelial cells (EC).** To isolate ECs, intestines were opened longitudinally, cut into 1 cm pieces and transferred to 50 ml tubes, containing 20 ml of DMEM supplemented with 5% FBS, antibiotics and 1mM DTT, incubated at 37°C with rotation (170 rpm) for 20 minutes and vortexed for 30 sec. Colon pieces were then transferred to 20 ml PBS/15mM EDTA and incubated for an additional 20 minutes with rotation (37°C). Crypts were further digested with serum free DMEM /2mg/ml Collagenase D (Roche) for 30 minutes with rotation (37°C). Single EC suspensions were passed through a 70  $\mu\text{m}$  cell strainer,

resuspended in complete media and overlaid on the top of a 20%:40% Percoll gradient. Percoll gradient separation was performed by centrifugation at 600g (1660 rpm) for 30 minutes. ECs were collected at the interphase of the 20%:40% Percoll gradient, washed and resuspended in DMEM medium.

**Isolation of colonic intraepithelial lymphocytes (IELs) and *lamina propria* (LP) cells.** To isolate IEL and LP cells, large intestines were opened longitudinally, briefly washed with ice-cold PBS and cut into 1 cm pieces. The tissue pieces were incubated in 20 ml of RPMI supplemented with 3% FBS, 5 mM EDTA and 0.145 mg/ml DTT for 20 min at 37°C with slow rotation. After incubation, the tissue pieces were vortexed vigorously for 30 sec and filtered using a 1mm tea strainer. The tissue pieces were then further vortexed in 10ml of 2mM EDTA/RPMI three times and all IEL containing fractions were pooled.

To isolate LP cells, the remaining tissue pieces were cut in 1 mm<sup>2</sup> pieces and placed in 5 ml RPMI containing 200 µg/ml Liberase (Roche) and 0.05% DNase I (Sigma) for 20 min at 37°C with slow rotation. Digestion was performed twice. After each incubation, the solution was vortexed intensely for 20sec and passed through a 100 µm cell strainer and both LP-containing cell fractions were pooled.

IEL and LP fractions were washed once in cold RPMI, resuspended in 40% Percoll, and overlaid on the top of 80% Percoll. Percoll gradient separation was performed by centrifugation for 20 min at 2500 rpm (1360g) at room temperature. IEL and LP cells were collected at the interphase of 40%:80% Percoll gradient, washed once, and resuspended in complete medium.

## Supplementary Figure 1. Macho-Fernandez et al

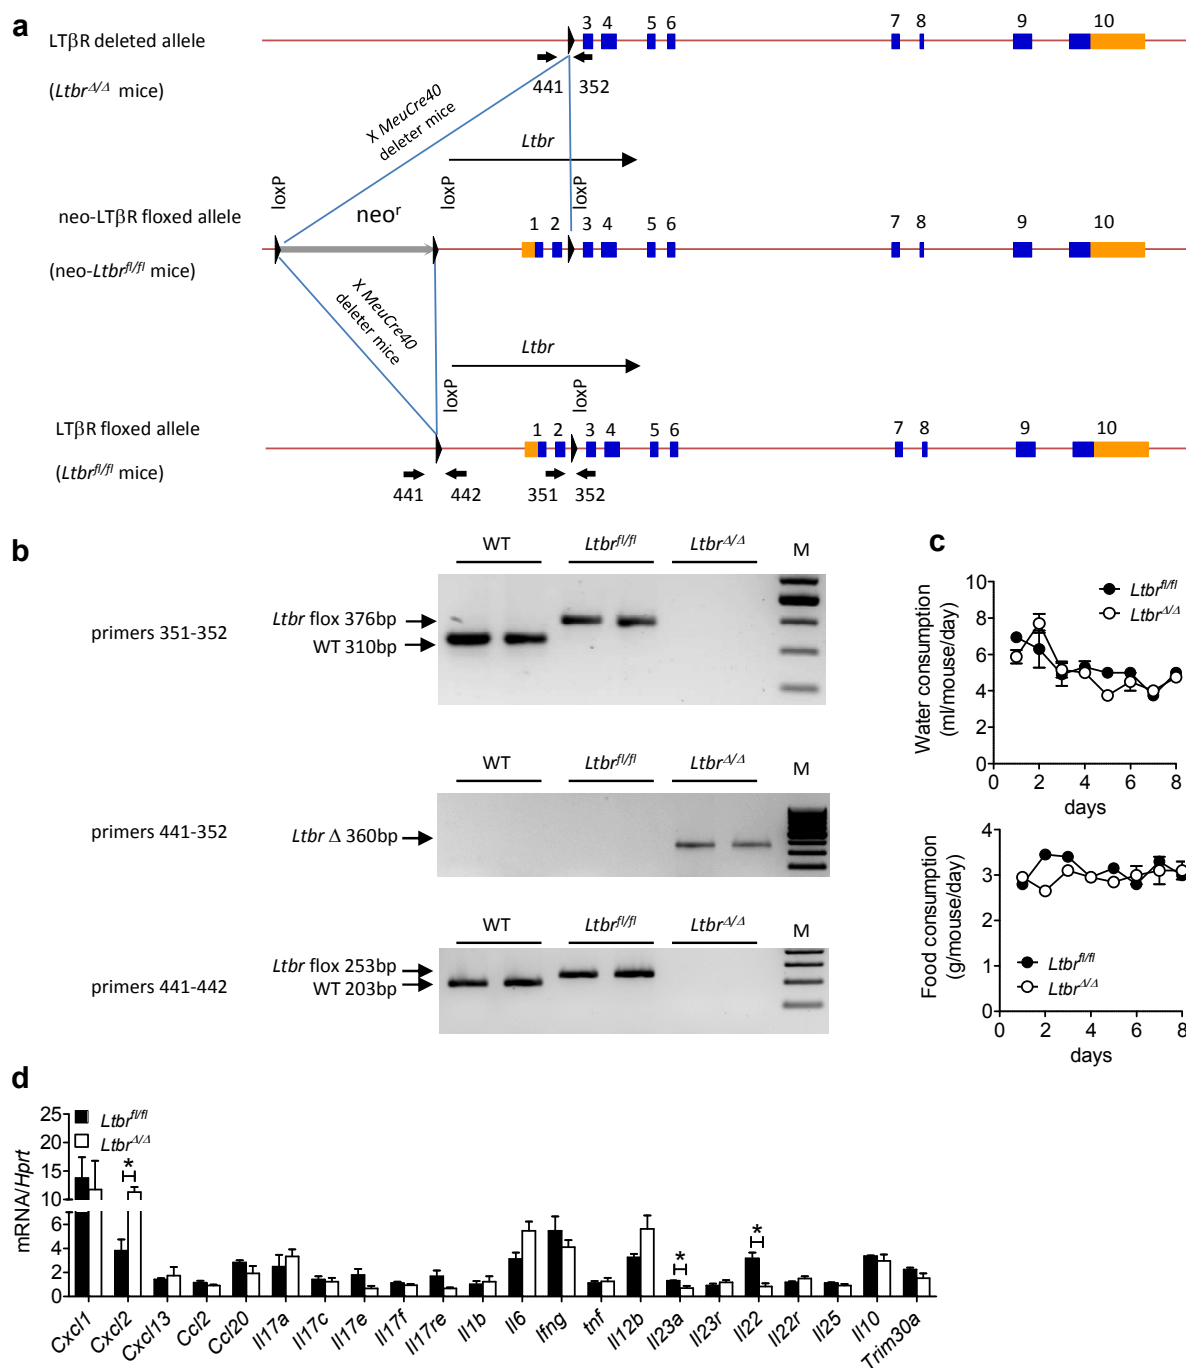

**Supplementary figure 1 (a and b)** Generation of neo-free LT $\beta$ R floxed mice and neo-free LT $\beta$ R-deficient mice. **(a)** Genomic locus in neo-free LT $\beta$ R-deficient mice (*Ltbr*<sup>-/-</sup>), neo-LT $\beta$ R floxed (*neo-Ltbr*<sup>fl/fl</sup>), and neo-free LT $\beta$ R floxed (*Ltbr*<sup>fl/fl</sup>) mice. Genotyping primers are indicated. **(b)** PCR analysis of *ltbr* gene deletion. Tail DNA from C57BL/6 (WT) mice, *Ltbr*<sup>fl/fl</sup> and *Ltbr*<sup>-/-</sup> mice were analyzed.

**(c)** Water and food consumption during DSS-induced colitis. *Ltbr*<sup>fl/fl</sup> and *Ltbr*<sup>-/-</sup> mice were treated for 5 days with 3.5% DSS. Water and food consumption were evaluated daily.

**(d)** Expression of genes associated with promotion or regulation of intestinal inflammation. Expression of genes was evaluated in the colon of *Ltbr*<sup>fl/fl</sup> and *Ltbr*<sup>-/-</sup> mice treated for 5 days with 3.5% DSS (n=5). Data are normalized to *Hprt*. \**P*<0.05 (Student's *t*-test). Data are representative of three independent experiments. Error bars represent SEM.

Supplementary Figure 2. Macho-Fernandez et al

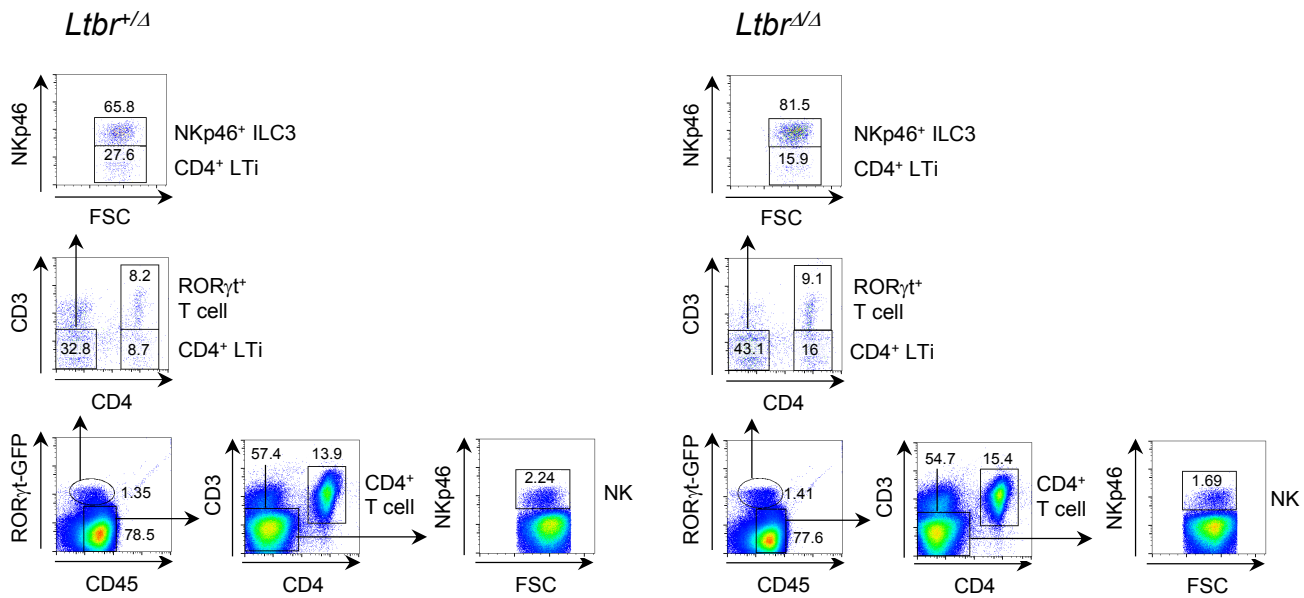

**Supplementary Figure 2** Sorting strategy for purification of colonic *lamina propria* cell populations. *Lamina propria* (LP) cells were purified from the colon of ROR $\gamma$ -GFP<sup>+/-</sup> *Ltbr*<sup>+/ $\Delta$</sup>  and ROR $\gamma$ -GFP<sup>+/-</sup> *Ltbr*<sup>-/ $\Delta$</sup>  reporter mice treated with 3.5% DSS for 5 days (n=3). Sorted LP cell populations are indicated as: CD4<sup>-</sup> LTi (CD45<sup>+</sup>ROR $\gamma$ <sup>+</sup>CD3<sup>-</sup>CD4<sup>-</sup>NKp46<sup>-</sup>), CD4<sup>+</sup> LTi (CD45<sup>+</sup>ROR $\gamma$ <sup>+</sup>CD3<sup>-</sup>CD4<sup>+</sup>NKp46<sup>-</sup>), NKp46<sup>+</sup> ILC3 (CD45<sup>+</sup>ROR $\gamma$ <sup>+</sup>CD3<sup>-</sup>CD4<sup>-</sup>NKp46<sup>+</sup>), ROR $\gamma$ <sup>+</sup> T cell (CD45<sup>+</sup>ROR $\gamma$ <sup>+</sup>CD3<sup>+</sup>CD4<sup>+</sup>NKp46<sup>-</sup>), CD4<sup>+</sup> T cell (CD45<sup>+</sup>ROR $\gamma$ <sup>+</sup>CD3<sup>+</sup>CD4<sup>+</sup>NKp46<sup>-</sup>) and NK cell (CD45<sup>+</sup>ROR $\gamma$ <sup>+</sup>CD3<sup>-</sup>CD4<sup>-</sup>NKp46<sup>+</sup>).

## Supplementary Figure 3. Macho-Fernandez et al

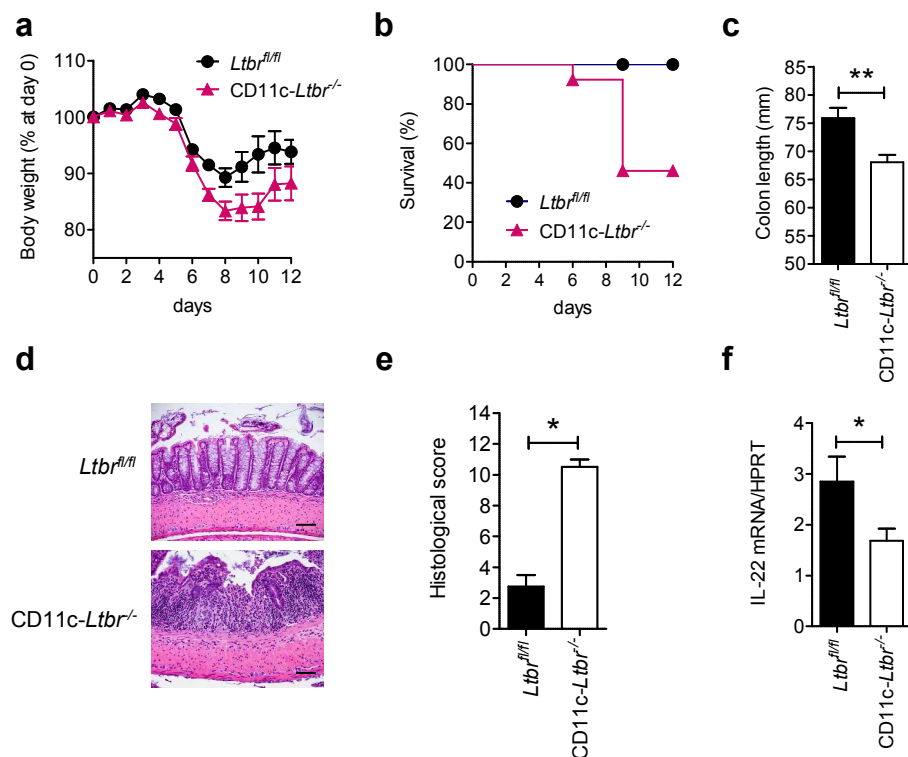

**Supplementary Figure 3.** LT $\beta$ R signaling in CD11c<sup>+</sup> cells contributes to protection against DSS-induced injury. *Ltbr<sup>fl/fl</sup>* and *CD11c-Ltbr<sup>-/-</sup>* mice (n=5) were treated for 5 days with 3.5% DSS.

(a) Weight loss and (b) survival. (c) Colon length, and (d) hematoxylin and eosin staining and histological score (e) of colon sections at day 11. (f) Colonic expression of *Il22* mRNA was evaluated at day 5. For mRNA expression, data are normalized to *Hprt*. \*P<0.05; \*\*P<0.01 (Student's *t*-test). Data are representative of two independent experiments. Error bars represent SEM.

Supplementary Figure 4. Macho-Fernandez et al

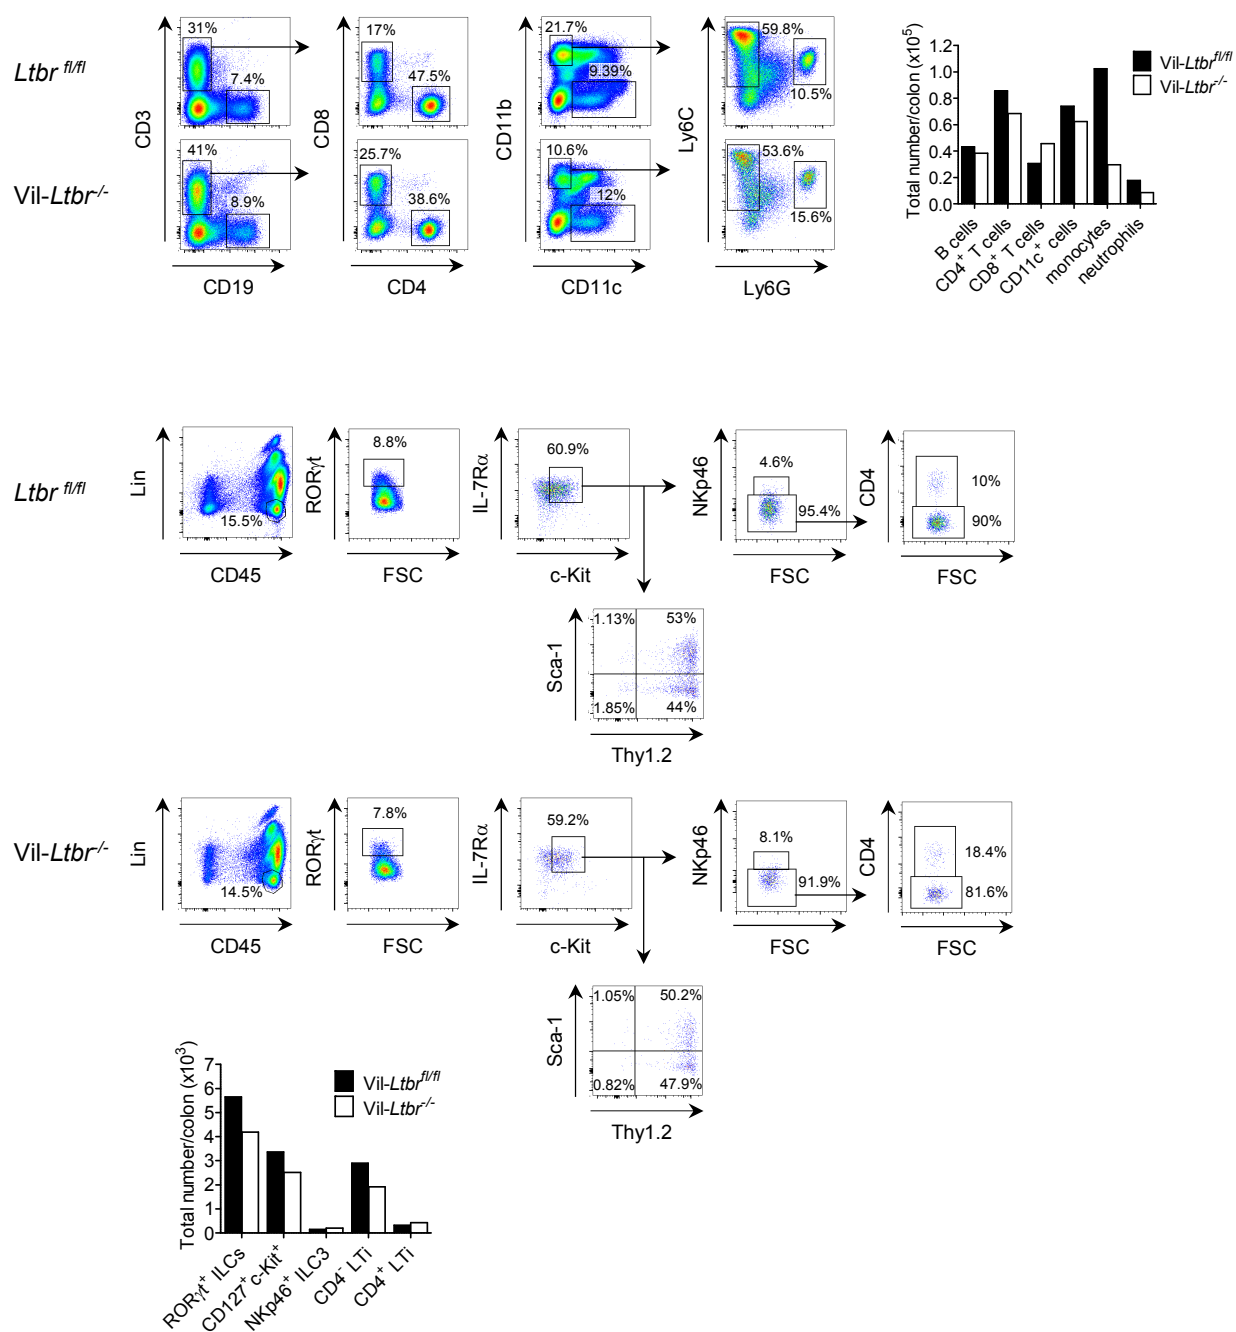

**Supplementary Figure 4.** *Vil-Ltb1<sup>-/-</sup>* mice display a normal recruitment of innate and adaptive immune cells to the colonic lamina propria during DSS-induced colitis. Colonic LP cells from *Ltb1<sup>fl/fl</sup>* mice and *Vil-Ltb1<sup>-/-</sup>* mice treated for 5 days with 3.5% DSS (n=3 per group) were analyzed by flow cytometry.

Supplementary Figure 5. Macho-Fernandez et al

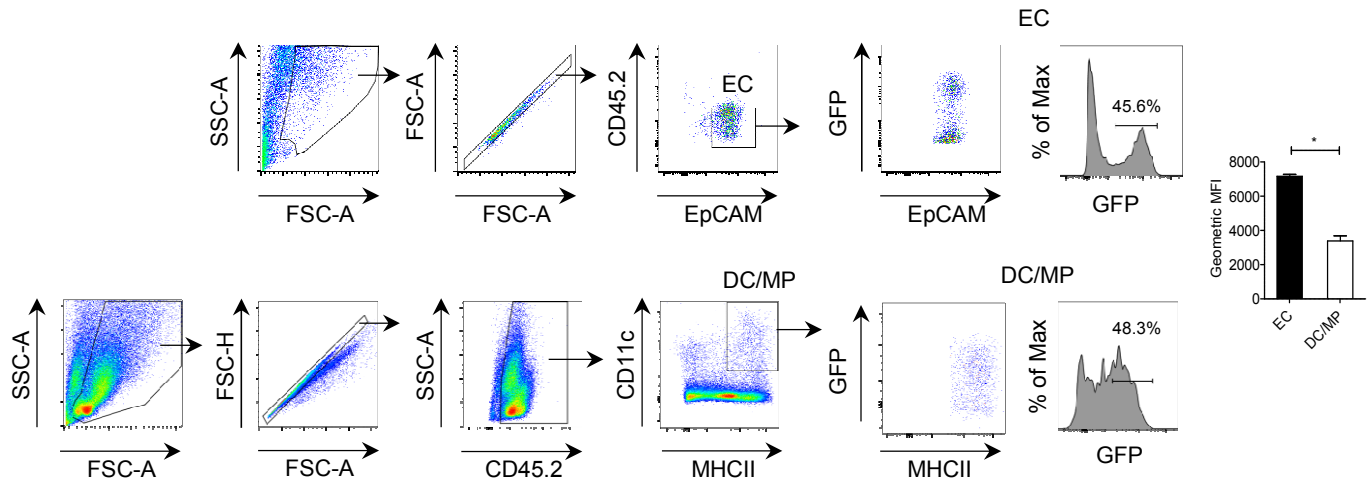

**Supplementary Figure 5.** Epithelial cells produce IL-23 in response to mucosal damage.

IL-23a-GFP<sup>+/-</sup> mice were treated with 3.5% DSS for 5 days (n=3). IL-23a-driven GFP expression in purified epithelial cells (EC, top panels) and dendritic cells and macrophages (DC/MP, bottom panels) was evaluated at day 5 in the colon of IL-23a-GFP<sup>+/-</sup> mice by flow cytometry. \* $P < 0.05$  (Student's *t*-test). Error bars represent SEM.



Supplementary Figure 6. Macho-Fernandez et al

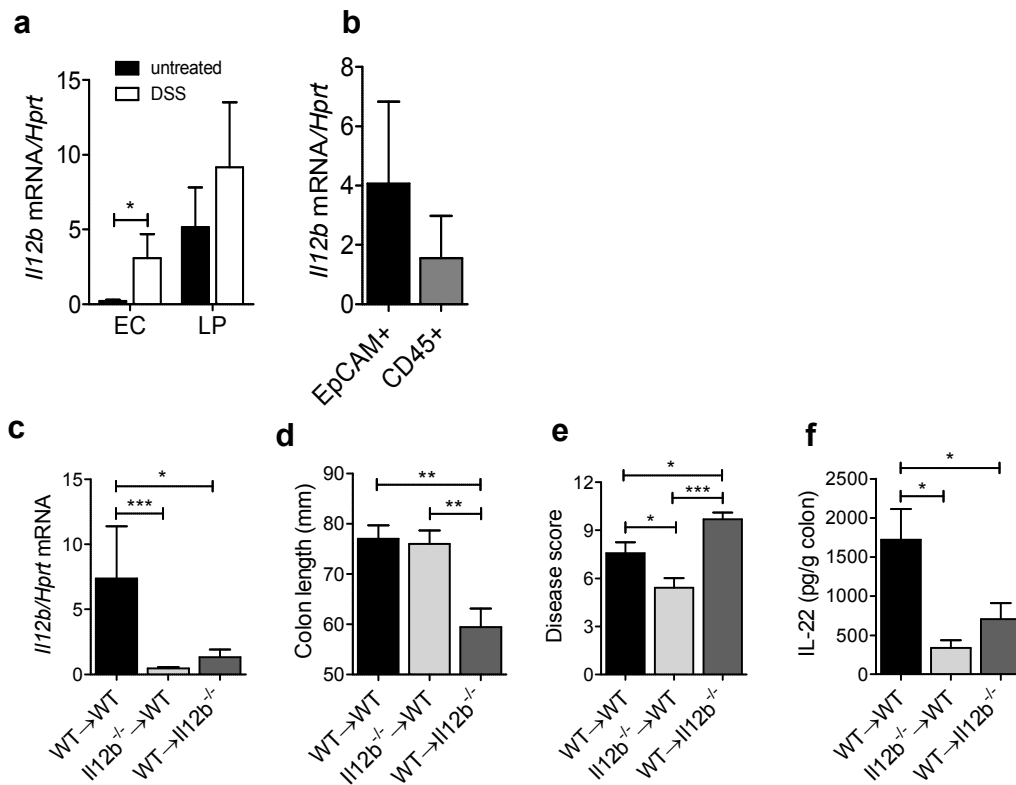

**Supplementary Figure 6.** Epithelial cell-derived IL12b promotes mucosal healing.

(a and b) Epithelial cells express IL12b in response to mucosal damage. WT (C57Black/6) mice were treated with 3.5% DSS for 5 days or left untreated (n=3 mice per group). (a) *Il12b* mRNA expression in percoll-purified fractions of epithelial cells (EC) or lamina propria (LP) cells from colon. (b) *Il12b* mRNA expression in sorted EpCAM<sup>+</sup>CD45<sup>-</sup> or EpCAM<sup>-</sup>CD45<sup>+</sup> cells from percoll-purified EC fraction from colon.

(c-f) Expression of IL12b in radioresistant cells promotes mucosal healing. Bone marrow cells from C57BL/6 (WT) or *Il12b*<sup>-/-</sup> mice were transferred into lethally-irradiated WT or *Il12b*<sup>-/-</sup> mice. Six weeks later, WT→WT, *Il12b*<sup>-/-</sup>→WT, and WT→*Il12b*<sup>-/-</sup> chimeric mice were treated for 5 days with 5% DSS.

(c) *Il12b* mRNA expression in the colon of chimeric mice at day 8.

(d-e) Colon length and clinical disease score at day 8.

(f) IL-22 production in the supernatants of colons collected at day 8 and cultured for 24h. For mRNA expression, data are normalized to *Hprt*. \**P*<0.05; \*\**P*<0.01; \*\*\**P*<0.001 (Student's *t*-test). Data are representative of two independent experiments with 3-8 mice per group. Error bars represent SEM.

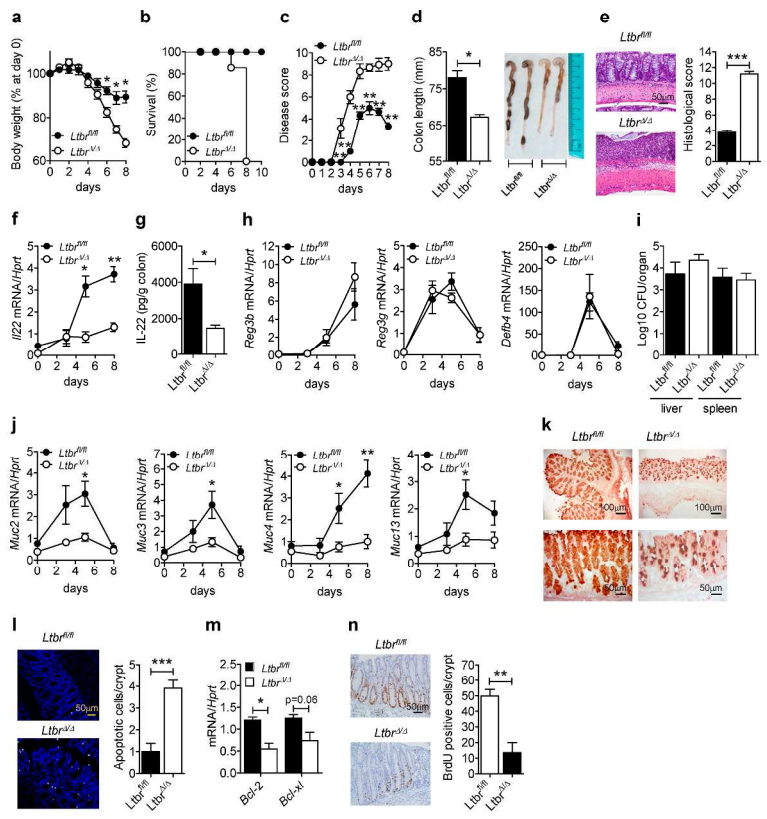

Macho-Fernandez et al Figure 1

215x279mm (600 x 600 DPI)
